CORRECTION

# Correction: Functional Translational Readthrough: A Systems Biology Perspective

The *PLOS Genetics* Staff

## Notice of Republication

This article was republished on 23<sup>rd</sup> August, 2016 to correct errors introduced during the production process under the heading ‘Systems Biology Approaches to Translational Readthrough in Metazoan’. Specifically, the last paragraph in box one was not separated from the preceding paragraph, and the subheading ‘Regression model’ was formatted incorrectly. The publisher apologizes for the errors. The originally published, uncorrected article and the republished, corrected article are provided here for reference.

## Supporting Information

**S1 File. Originally published, uncorrected article.**

(PDF)

**S2 File. Republished, corrected article.**

(PDF)

## Reference

1. Schueren F, Thoms S (2016) Functional Translational Readthrough: A Systems Biology Perspective. *PLoS Genet* 12(8): e1006196. doi: [10.1371/journal.pgen.1006196](https://doi.org/10.1371/journal.pgen.1006196) PMID: [27490485](https://pubmed.ncbi.nlm.nih.gov/27490485/)

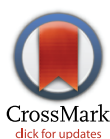

## OPEN ACCESS

**Citation:** The *PLOS Genetics* Staff (2016) Correction: Functional Translational Readthrough: A Systems Biology Perspective. *PLoS Genet* 12(11): e1006434. doi:[10.1371/journal.pgen.1006434](https://doi.org/10.1371/journal.pgen.1006434)

**Published:** November 4, 2016

**Copyright:** © 2016 The PLOS Genetics Staff. This is an open access article distributed under the terms of the [Creative Commons Attribution License](https://creativecommons.org/licenses/by/4.0/), which permits unrestricted use, distribution, and reproduction in any medium, provided the original author and source are credited.
